# Supplementary material for: Gold nanoparticles decorated with a ferrocene derivative as a potential shift-based transducing system of interest for sensitive immunosensing
Source: Royal Society of Chemistry journal article supplement (doi:10.1039/c3tb20503g), 2013-01-01
Supplement: c3tb20503g.pdf [file c3tb20503g.pdf]

## Electronic Supplementary Information

### Gold nanoparticles decorated with ferrocene derivative as a potential shift-based transducing system with interest for sensitive immunosensing

Abdelmoneim Mars,<sup>a,b</sup> Claudio Parolo,<sup>a</sup> Nouredine Raouafi,<sup>\*b</sup> Khaled Boujlel<sup>b</sup> and Arben Merkoçi<sup>\*a,c</sup>

*\* Prof. A. Merkoçi, Prof. N. Raouafi*

<sup>a</sup> Nanobioelectronics & Biosensors Group, Catalan Institute of Nanotechnology (ICN, Campus de la UAB -Edifici Q (ETSE) - 2<sup>a</sup> planta, 08193 Bellaterra, Barcelona, Spain. Fax: +34935868020; Tel: +34935868014. E-mail: arben.merkoci@icn.cat

<sup>b</sup> University of Tunis El-Manar, Faculty of Science, Laboratory of Analytical Chemistry and Electrochemistry, Campus Universitaire de Tunis El-Manar

2092, Tunis, Tunisia. Fax: +21671883424; Tel: +21671872600, Email: n.raouafi@fst.rnu.tn

<sup>c</sup> ICREA, Barcelona, Spain.

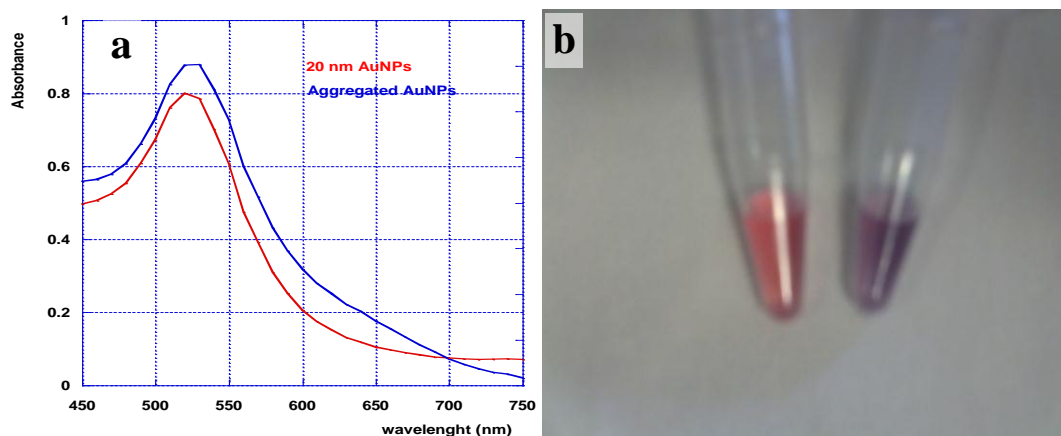

**Fig. S1** (a) AuNPs SPR band change in UV-visible spectroscopy before (red) and after (bleu) the FcD addition; (b) The AuNPs colour change during the aggregations red (before) and purple (after).

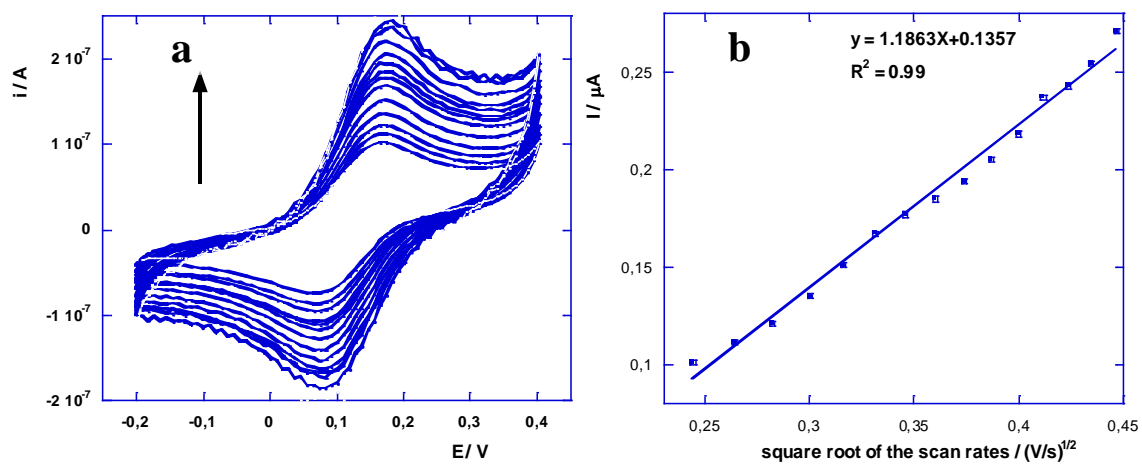

**Fig. S2** (a) Cyclic voltammograms of the HIgG immunosensor without the analyte at different scan rates from 50 to 170 mV/s in mQ water, (b): the linear dependence of oxidation peak current on the square root of the scan rate.

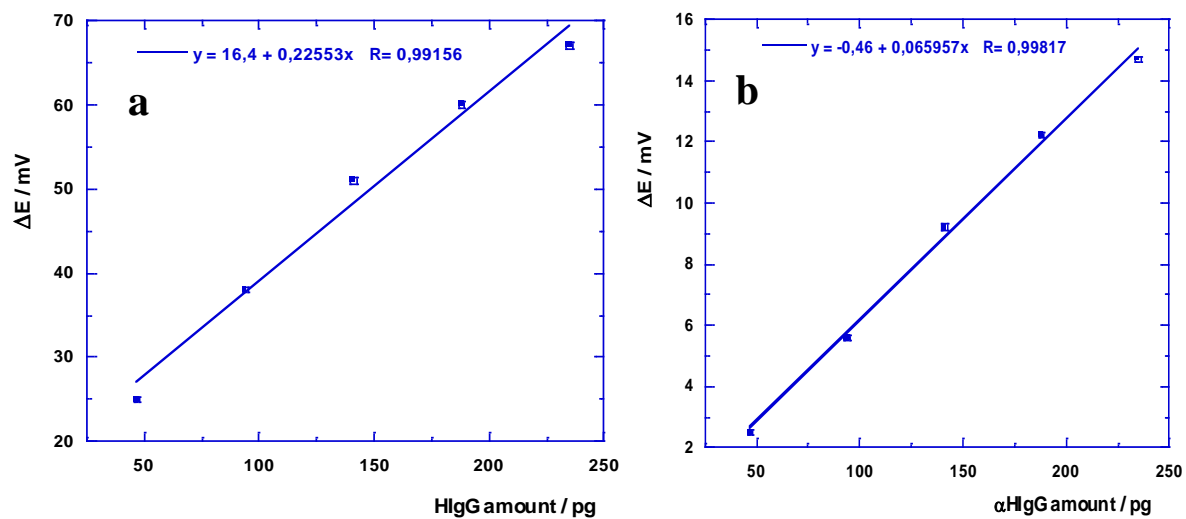

**Fig. S3** Oxidation peak potential variation versus the protein amounts: (a) HlgG and (b) GIgG

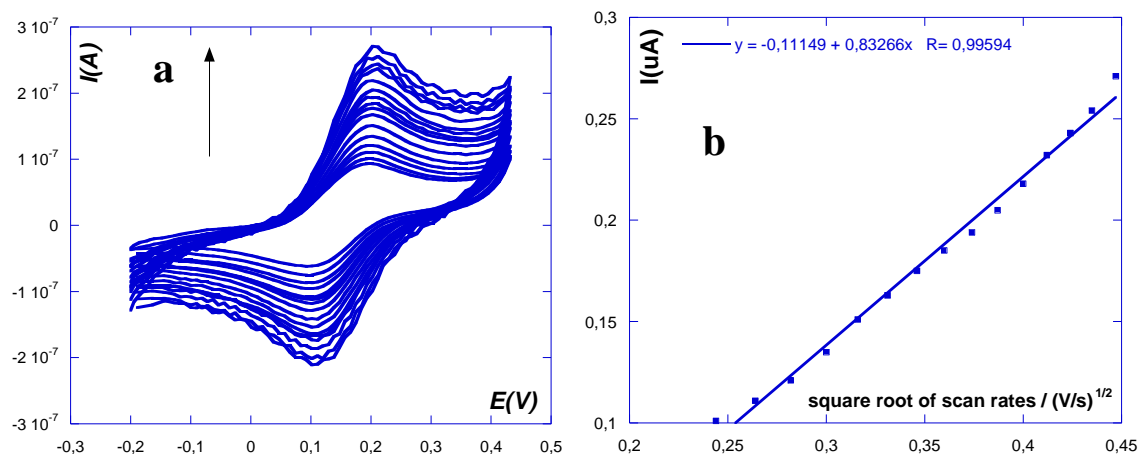

**Fig. S4.1** (a) CV curves of the immunosensor with 47 ng/mL of HIgG at different scan rates from 50 to 200 mV/s in mQ water, (b): the linear dependence of oxidation peak current on the square root of the scan rates.

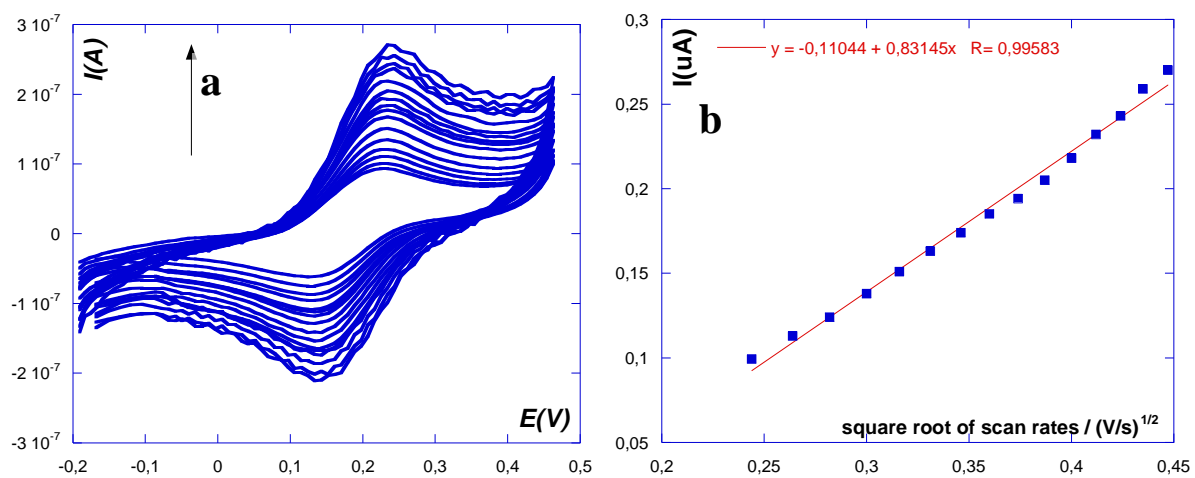

**Fig. S4.2** (a) CV curves of the immunosensor with 141 ng/mL of HIgG at different scan rates from 50 to 170 mV/s in mQ water, (b): the linear dependence of oxidation peak current on the square root of the scan rates.

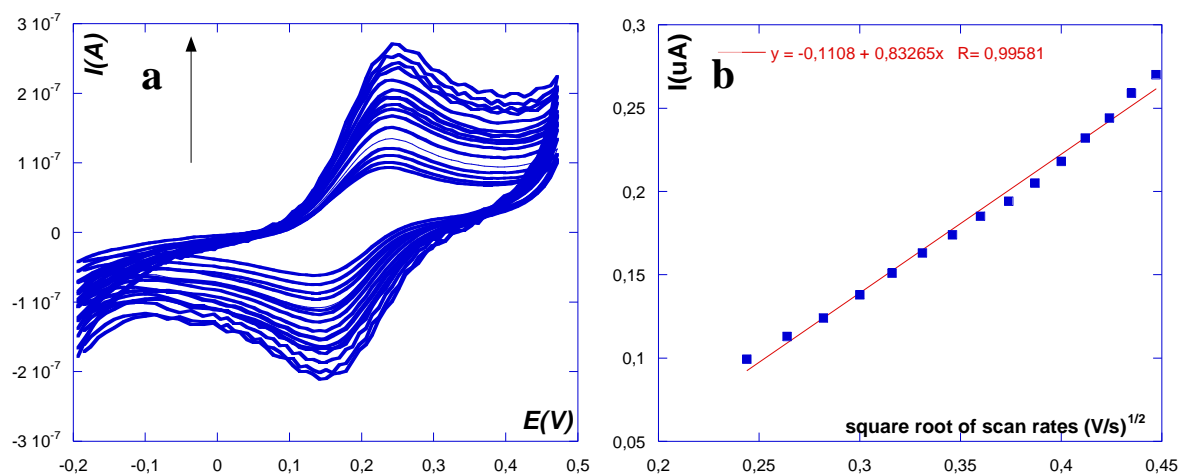

**Fig. S4.3** (a) CV curves of the immunosensor with 188 ng/mL of HIgG at different scan rates from 50 to 170 mV/s in mQ water, (b): the linear dependence of oxidation peak current on the square root of the scan rates.

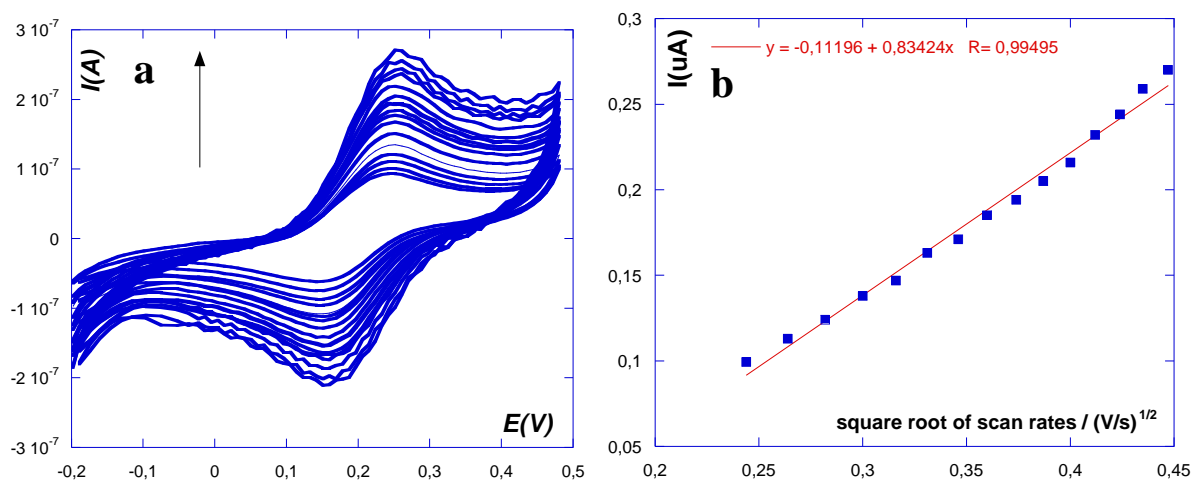

**Fig. S4.4** (a) CV curves of the immunosensor with 235 ng/mL of HIgG at different scan rates from 50 to 170 mV/s in mQ water, (b): the linear dependence of oxidation peak current on the square root of the scan rates.

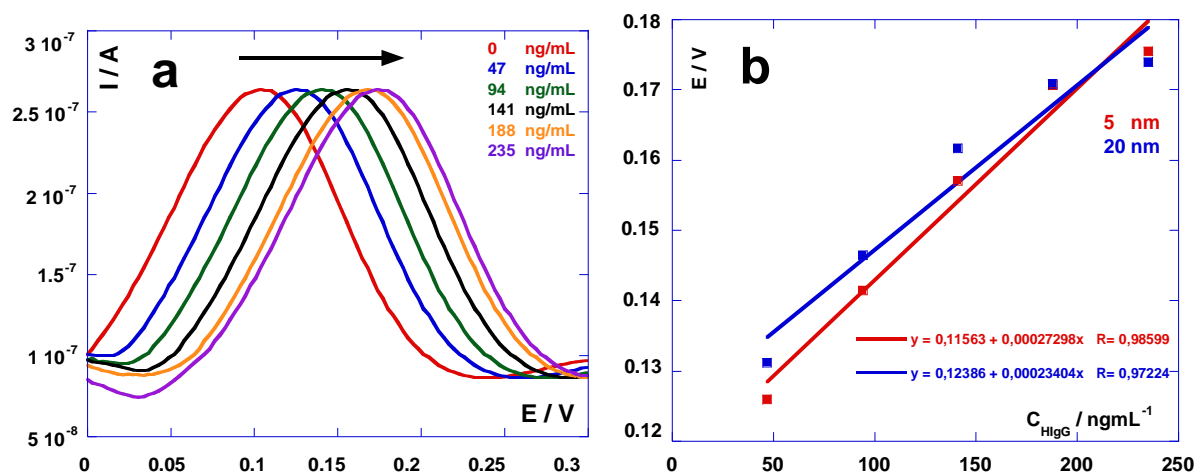

**Fig. S5** DPV curves evidencing HIgG/ $\alpha$ HIgG Ag/Ab recognition after progressive addition of HIgG (47 ng/mL each time) for 5 nm based immunosensor. (b) Comparison of potential variation versus added IgG amounts and fitting curves for 5 and 20 nm based immunosensors.

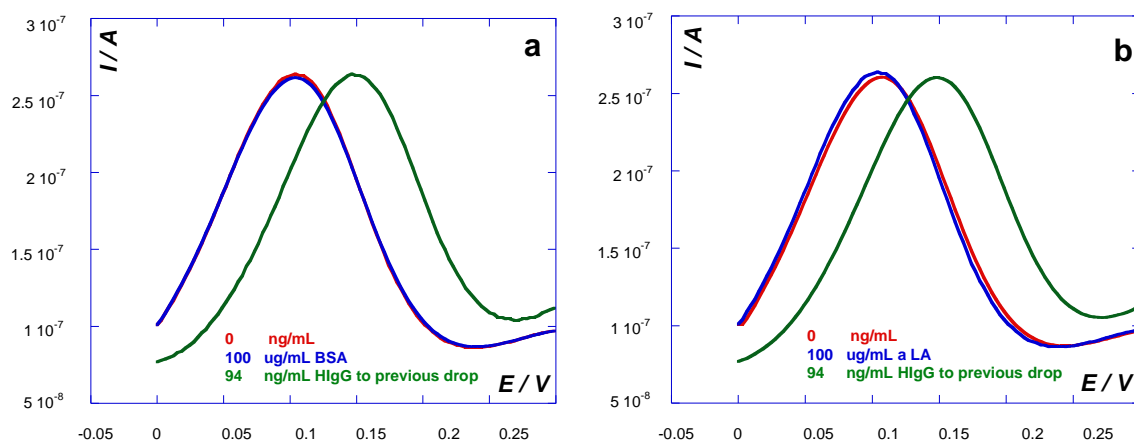

**Fig. S6** selectivity study of the immunosensor response, (a) DPV response of HlgG immunosensor to the BSA protein, (b) DPV response of HlgG immunosensor to the  $\alpha$ LA protein.

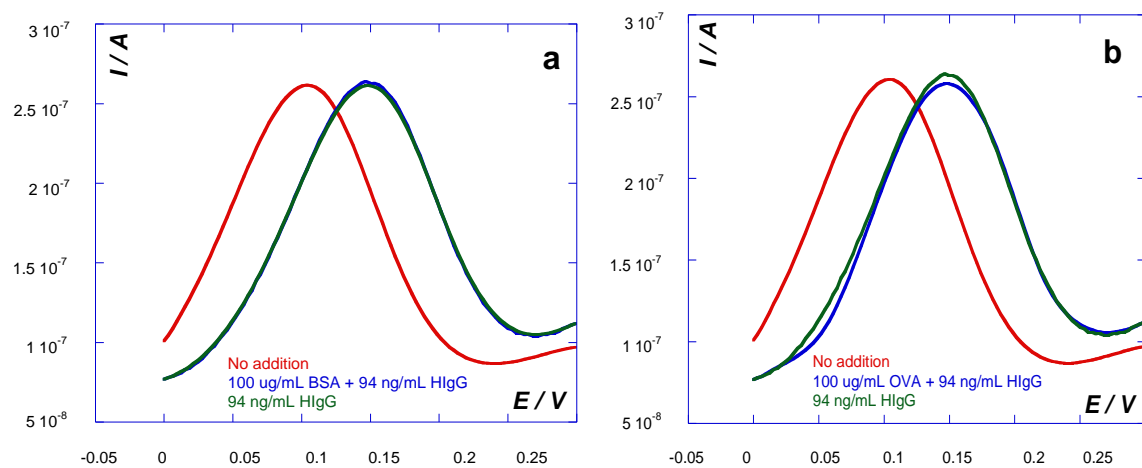

**Fig. S7** specificity study of the immunosensor response, (a) DPV immunoresponse of HIgG sensor to the BSA protein, (b) DPV immunoresponse of HIgG sensor to OVA protein.
